# Supplementary material
Source: PubMed Central journal article supplement (PMC9912811)

## SUPPLEMENTARY MATERIAL

Supplementary Table S1. Patient characteristics by type and time period of procedure.

### S1A. Major amputations

|                | Major amputation |             |             |             |
|----------------|------------------|-------------|-------------|-------------|
|                | Pre-pandemic     | Wave 1      | Respite     | Wave 2/3    |
| n              | 3,776            | 1,091       | 1,102       | 1,276       |
| Age – y        | 69 (60-77)       | 68 (59-77)  | 68 (59-76)  | 69 (60-76)  |
| Men            | 72.9             | 72.5        | 72.7        | 74.2        |
| Diabetes       | 56.2             | 57.2        | 53.4        | 54.2        |
| COPD           | 23.2             | 22.8        | 23.5        | 25.7        |
| IHD            | 39.8             | 37.1        | 37.4        | 37.3        |
| CHF            | 12.4             | 12.4        | 12.0        | 11.9        |
| CKD            | 21.3             | 20.4        | 21.1        | 19.0        |
| Current smoker | <b>31.7</b>      | <b>32.7</b> | <b>35.2</b> | <b>35.9</b> |

### S1B. Elective and non-elective bypass procedures

|                | Elective bypass |             |             |             | Non-elective bypass |             |             |             |
|----------------|-----------------|-------------|-------------|-------------|---------------------|-------------|-------------|-------------|
|                | Pre-pandemic    | Wave 1      | Respite     | Wave 2/3    | Pre-pandemic        | Wave 1      | Respite     | Wave 2/3    |
| n              | 4,672           | 639         | 1,054       | 1,087       | 2,901               | 734         | 836         | 1,058       |
| Age – y        | 69 (62-76)      | 70 (62-76)  | 69 (61-75)  | 70 (62-75)  | 71 (62-77)          | 69 (61-77)  | 69 (60-76)  | 70 (61-77)  |
| Men            | 74.5            | 75.0        | 77.3        | 73.1        | 72.4                | 73.6        | 70.5        | 70.3        |
| Diabetes       | 33.9            | 38.0        | 36.2        | 34.2        | 39.3                | 40.3        | 40.7        | 40.5        |
| COPD           | 24.3            | 27.5        | 25.2        | 25.4        | 25.4                | 28.6        | 27.0        | 26.3        |
| IHD            | 34.9            | 33.3        | 34.3        | 31.9        | <b>34.9</b>         | <b>37.6</b> | <b>35.4</b> | <b>31.0</b> |
| CHF            | 5.8             | 5.5         | 5.7         | 5.2         | 8.0                 | 7.8         | 8.4         | 7.3         |
| CKD            | 9.4             | 11.4        | 9.4         | 10.5        | 12.2                | 10.5        | 12.1        | 11.2        |
| Current smoker | <b>31.4</b>     | <b>36.0</b> | <b>33.3</b> | <b>37.0</b> | <b>40.4</b>         | <b>43.9</b> | <b>44.9</b> | <b>45.6</b> |

## S1C. Elective and non-elective endovascular procedures

|                | Elective endovascular |             |             |             | Non-elective endovascular |            |            |            |
|----------------|-----------------------|-------------|-------------|-------------|---------------------------|------------|------------|------------|
|                | Pre-pandemic          | Wave 1      | Respite     | Wave 2/3    | Pre-pandemic              | Wave 1     | Respite    | Wave 2/3   |
| n              | 7,170                 | 1,178       | 1,392       | 1,728       | 2,918                     | 638        | 719        | 969        |
| Age - y        | 71 (63-78)            | 72 (63-80)  | 72 (64-79)  | 72 (64-79)  | 72 (64-80)                | 72 (63-80) | 72 (63-80) | 71 (63-80) |
| Men            | 67.4                  | 68.7        | 66.8        | 69.2        | 67.7                      | 69.1       | 67.5       | 67.8       |
| Diabetes       | <b>44.1</b>           | <b>53.4</b> | <b>48.8</b> | <b>48.3</b> | 63.6                      | 65.7       | 65.9       | 61.3       |
| COPD           | <b>16.8</b>           | <b>17.7</b> | <b>19.0</b> | <b>19.6</b> | 19.5                      | 18.8       | 17.5       | 19.2       |
| IHD            | 30.3                  | 29.4        | 33.1        | 30.9        | 34.6                      | 30.7       | 32.4       | 31.2       |
| CHF            | <b>6.5</b>            | <b>8.4</b>  | <b>8.3</b>  | <b>9.8</b>  | 12.1                      | 12.4       | 13.5       | 11.6       |
| CKD            | <b>12.5</b>           | <b>16.0</b> | <b>17.4</b> | <b>15.6</b> | 23.3                      | 27.0       | 26.8       | 23.0       |
| Current smoker | 26.7                  | 25.6        | 27.4        | 26.4        | 24.9                      | 24.8       | 21.0       | 26.0       |

Data on comorbidities, sex and smoking are presented as percentages, and age as median (interquartile range). COPD: chronic obstructive pulmonary disease; IHD: ischaemic heart disease; CHF: chronic heart failure; CKD: chronic kidney disease.

Figures in bold indicate statistically significant difference between time-periods.

Supplementary Table S2. Complications and re-interventions by type and time period of procedure

S2A. Major amputations

|                         | Major amputation |            |            |            |
|-------------------------|------------------|------------|------------|------------|
|                         | Pre-pandemic     | Wave 1     | Respite    | Wave 2/3   |
| <b>Complications</b>    |                  |            |            |            |
| Cardiac                 | 5.6              | 3.8        | 4.2        | 4.9        |
| Stroke                  | 0.6              | 0.5        | 0.6        | 0.5        |
| Renal                   | 3.4              | 2.7        | 2.5        | 3.1        |
| Limb ischaemia          | 3.0              | 2.0        | 2.9        | 3.1        |
| <b>Re-interventions</b> |                  |            |            |            |
| Bypass                  | 0.5              | 0.2        | 0.4        | 0.5        |
| Angioplasty             | 0.7              | 0.8        | 1.0        | 0.5        |
| Major LEA               | <b>4.9</b>       | <b>2.8</b> | <b>6.2</b> | <b>4.5</b> |
| Minor LEA               | 0.2              | 0.1        | 0.3        | 0.1        |

S2B. Elective and non-elective bypass procedures

|                         | Elective bypass |            |            |            | Non-elective bypass |            |            |            |
|-------------------------|-----------------|------------|------------|------------|---------------------|------------|------------|------------|
|                         | Pre-pandemic    | Wave 1     | Respite    | Wave 2/3   | Pre-pandemic        | Wave 1     | Respite    | Wave 2/3   |
| <b>Complications</b>    |                 |            |            |            |                     |            |            |            |
| Cardiac                 | 2.2             | 2.5        | 2.3        | 2.1        | 4.9                 | 3.1        | 4.4        | 4.5        |
| Stroke                  | 0.3             | 0.3        | 0.3        | 0.5        | 0.4                 | 1.0        | 0.7        | 0.4        |
| Renal                   | 1.2             | 1.1        | 0.8        | 1.0        | 2.7                 | 2.2        | 2.2        | 2.1        |
| Limb ischaemia          | 2.9             | 3.8        | 3.7        | 4.1        | 9.0                 | 8.4        | 8.4        | 8.6        |
| <b>Re-interventions</b> |                 |            |            |            |                     |            |            |            |
| Bypass                  | <b>1.3</b>      | <b>2.0</b> | <b>2.7</b> | <b>2.3</b> | 3.4                 | 2.6        | 3.8        | 3.0        |
| Angioplasty             | 1.2             | 1.1        | 1.2        | 2.8        | <b>2.0</b>          | <b>1.6</b> | <b>2.2</b> | <b>4.0</b> |
| Major LEA               | <b>1.0</b>      | <b>2.3</b> | <b>1.3</b> | <b>1.0</b> | 7.2                 | 7.5        | 6.9        | 5.7        |
| Minor LEA               | 0.9             | 1.4        | 1.6        | 1.0        | 4.8                 | 3.8        | 4.3        | 4.4        |

## S2C. Elective and non-elective endovascular procedures

|                         | Elective endovascular |        |         |          | Non-elective endovascular |            |            |            |
|-------------------------|-----------------------|--------|---------|----------|---------------------------|------------|------------|------------|
|                         | Pre-pandemic          | Wave 1 | Respite | Wave 2/3 | Pre-pandemic              | Wave 1     | Respite    | Wave 2/3   |
| <b>Complications</b>    |                       |        |         |          |                           |            |            |            |
| Cardiac                 | 0.3                   | 0.6    | 0.3     | 0.3      | 1.5                       | 1.4        | 1.3        | 1.9        |
| Stroke                  | 0.0                   | 0.1    | 0.0     | 0.1      | 0.2                       | 0.3        | 0.3        | 0.2        |
| Renal                   | 0.2                   | 0.3    | 0.1     | 0.1      | 1.2                       | 0.9        | 1.4        | 1.0        |
| Limb ischaemia          | 0.4                   | 0.4    | 0.9     | 0.3      | <b>3.3</b>                | <b>5.5</b> | <b>4.5</b> | <b>5.3</b> |
| <b>Re-interventions</b> |                       |        |         |          |                           |            |            |            |
| Bypass                  | 0.7                   | 0.3    | 0.6     | 1.1      | 3.5                       | 3.0        | 3.6        | 4.0        |
| Angioplasty             | 1.1                   | 1.5    | 1.9     | 1.1      | 4.3                       | 6.1        | 4.3        | 3.6        |
| Major LEA               | 0.5                   | 0.8    | 0.9     | 0.5      | 6.0                       | 6.9        | 5.7        | 6.0        |
| Minor LEA               | 0.7                   | 1.4    | 0.9     | 0.8      | 6.8                       | 6.6        | 5.6        | 7.1        |

Data are presented as percentages. LEA: lower extremity amputation.

Figures in bold indicate statistically significant differences between time-periods.

Supplementary Table S3. Adjusted odds ratio for in-hospital mortality based on multivariable logistic regression models

|                                                  | Model 1           | Model 2            | Model 3            | Model 4           |
|--------------------------------------------------|-------------------|--------------------|--------------------|-------------------|
| <b>Time period of procedure</b>                  |                   |                    |                    |                   |
| Pre-pandemic                                     | 1.00 (reference)  | 1.00 (reference)   | 1.00 (reference)   | 1.00 (reference)  |
| Wave 1                                           | 1.45 (1.23, 1.72) | 1.16 (0.97, 1.38)  | 1.19 (1.00, 1.41)  | 0.94 (0.78, 1.13) |
| Respite                                          | 1.32 (1.12, 1.55) | 1.15 (0.97, 1.36)  | 1.18 (0.99, 1.39)  | 1.04 (0.88, 1.23) |
| Wave 2/3                                         | 1.61 (1.39, 1.86) | 1.38 (1.19, 1.59)  | 1.43 (1.23, 1.66)  | 1.06 (0.90, 1.24) |
| <b>SARS-CoV-2 infection</b>                      |                   |                    |                    | 5.88 (4.80, 7.21) |
| <b>Procedure type</b>                            |                   |                    |                    |                   |
| Elective endovascular                            |                   | 1.00 (reference)   | 1.00 (reference)   | 1.00 (reference)  |
| Amputation                                       |                   | 8.96 (6.82, 11.89) | 8.51 (6.47, 11.19) | 7.23 (5.48, 9.53) |
| Elective bypass                                  |                   | 1.69 (1.22, 2.36)  | 1.73 (1.24, 2.40)  | 1.64 (1.18, 2.29) |
| Non-elective bypass                              |                   | 4.64 (3.45, 6.23)  | 4.55 (3.38, 6.11)  | 4.10 (3.04, 5.52) |
| Non-elective endovascular                        |                   | 5.59 (4.26, 7.34)  | 5.21 (3.96, 6.83)  | 4.81 (3.66, 6.32) |
| <b>General anaesthetic</b>                       |                   | 1.13 (0.98, 1.31)  | 1.32 (1.14, 1.53)  | 1.35 (1.17, 1.58) |
| <b>Indication for surgery</b>                    |                   |                    |                    |                   |
| CLI Fontaine I/II                                |                   | 1.00 (reference)   | 1.00 (reference)   | 1.00 (reference)  |
| CLI Fontaine III/IV                              |                   | 2.66 (1.83, 3.87)  | 2.17 (1.49, 3.17)  | 2.23 (1.53, 3.25) |
| Infection                                        |                   | 2.84 (1.87, 4.31)  | 2.58 (1.70, 3.93)  | 2.65 (1.74, 4.05) |
| Acute limb ischaemia                             |                   | 4.81 (3.25, 7.12)  | 4.41 (2.98, 6.52)  | 4.33 (2.92, 6.42) |
| Trauma                                           |                   | 2.95 (1.40, 6.21)  | 3.79 (1.79, 8.01)  | 3.83 (1.79, 8.18) |
| Aneurysm                                         |                   | 1.99 (1.13, 3.51)  | 1.73 (0.98, 3.06)  | 1.77 (1.00, 3.13) |
| <b>Patient characteristics and comorbidities</b> |                   |                    |                    |                   |
| Age (5-year interval)                            |                   |                    | 1.15 (1.12, 1.19)  | 1.15 (1.12, 1.18) |
| Female                                           |                   |                    | 1.10 (0.97, 1.24)  | 1.10 (0.97, 1.25) |
| Diabetes mellitus                                |                   |                    | 1.01 (0.89, 1.14)  | 1.00 (0.88, 1.13) |
| COPD                                             |                   |                    | 1.24 (1.09, 1.41)  | 1.23 (1.07, 1.40) |
| IHD                                              |                   |                    | 1.22 (1.08, 1.38)  | 1.27 (1.12, 1.44) |
| CHF                                              |                   |                    | 1.33 (1.13, 1.57)  | 1.35 (1.14, 1.59) |
| CKD                                              |                   |                    | 2.10 (1.84, 2.39)  | 2.07 (1.82, 2.36) |

Data are presented as adjusted odds ratio (95% confidence interval). CLI: chronic limb ischaemia; COPD: chronic obstructive pulmonary disease; IHD: ischaemic heart disease; CHF: chronic heart failure; CKD: chronic kidney disease

Supplementary Figure S1. Figure demonstrating the time from admission to procedure (A) and length of stay (B) in days as median and interquartile range, by type and time period of procedure

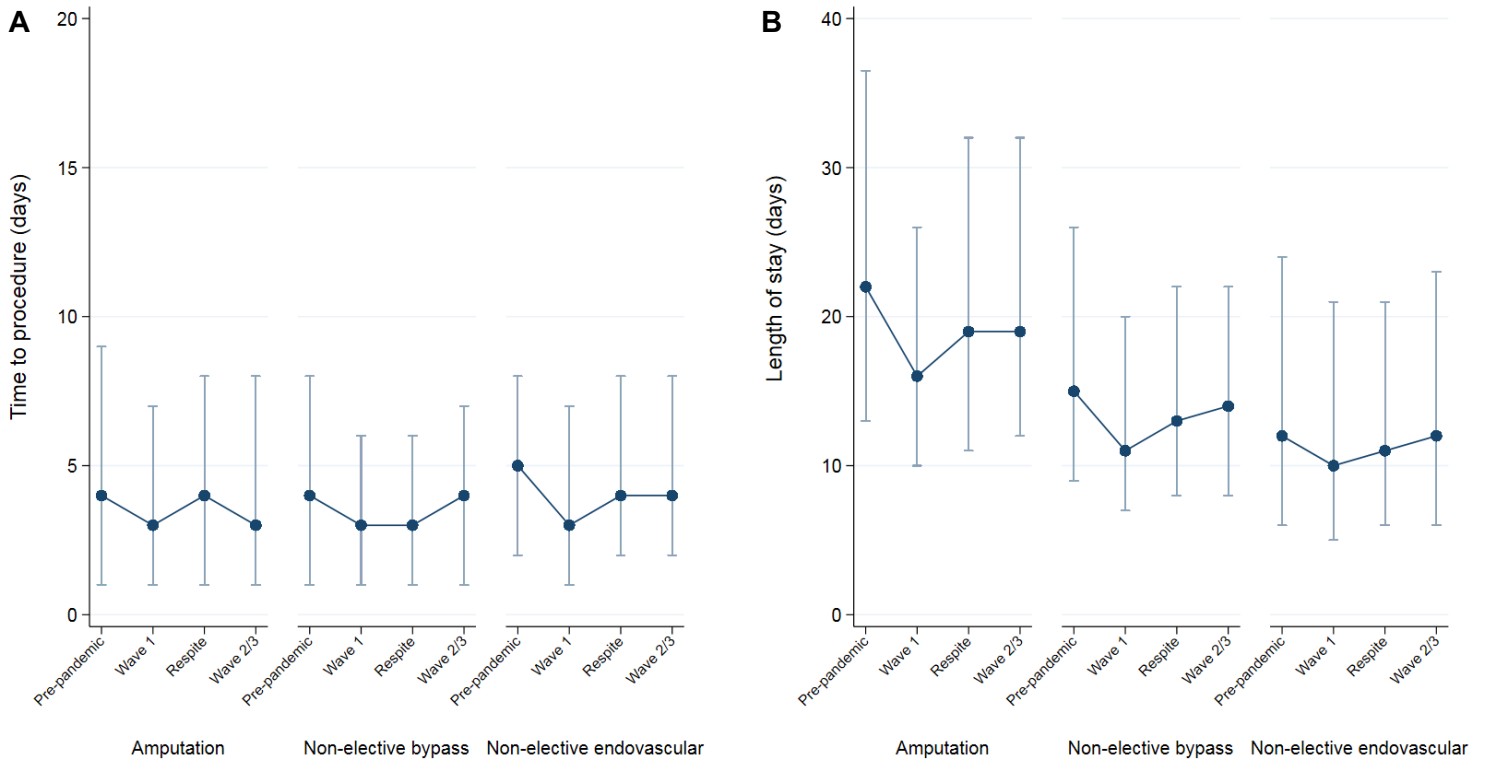

Supplement: mmc1.pdf [file mmc1.pdf]
